# Supplementary material
Source: publisher figshare collection journal article supplement (https://acs.figshare.com/ndownloader/files/9112831)
Supplement: Supplementary file 1 [file 9112831]

## **SUPPLEMENTARY INFORMATION**

### **DEPENDENCE OF BINDING FREE ENERGIES BETWEEN RNA NUCLEOBASES AND PROTEIN SIDE CHAINS ON LOCAL DIELECTRIC PROPERTIES**

Anita de Ruiter<sup>#</sup>, Anton A. Polyansky & Bojan Zagrovic<sup>\*</sup>

Department of Structural and Computational Biology, Max F. Perutz Laboratories,  
University of Vienna, Campus Vienna Biocenter 5, Vienna A-1030, Austria

**<sup>#</sup>Present address:**

Institute of Molecular Modeling and Simulation, BOKU, Muthgasse 18, Vienna, A-1190, Austria

**<sup>\*</sup>Correspondence:**

Email: [bojan.zagrovic@univie.ac.at](mailto:bojan.zagrovic@univie.ac.at)

Tel: +43 2 4277 52271

Fax: +43 1 4277 9522

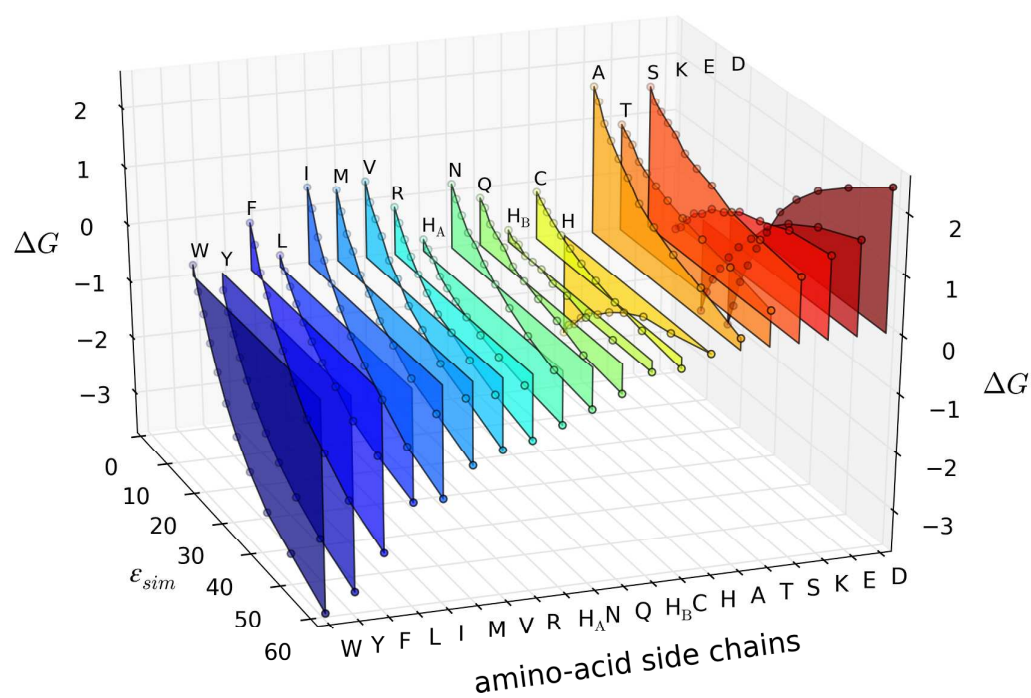

**Figure S1.** Absolute binding free energies of amino-acid side chains and CYT, as a function of the dielectric constant of the environment. Please, see Figure 5 in the main manuscript for a more detailed description.

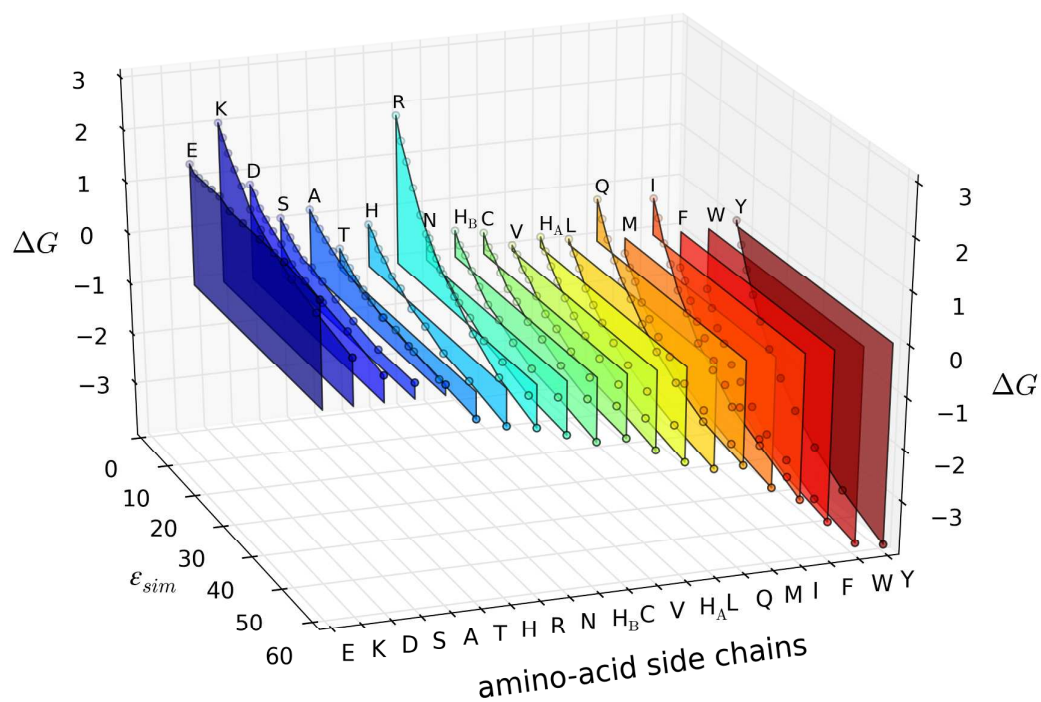

**Figure S2.** Absolute binding free energies of amino-acid side chains and ADE, as a function of the dielectric constant of the environment. Please, see Figure 5 in the main manuscript for a more detailed description.

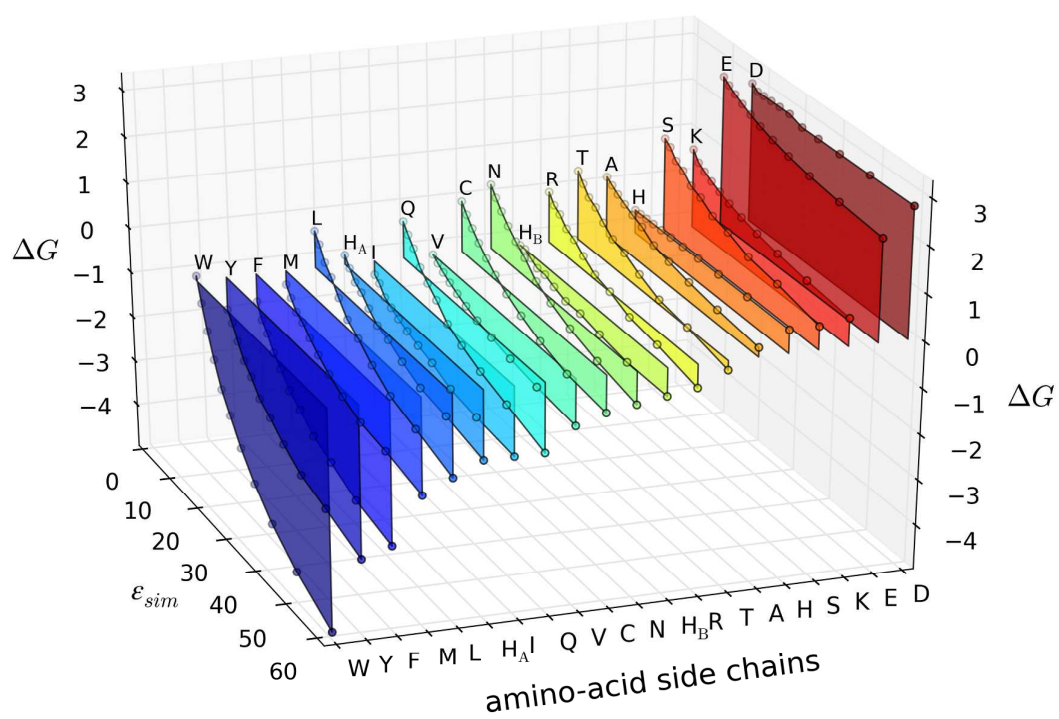

**Figure S3.** Absolute binding free energies of amino acid-side chains and URA, as a function of the dielectric constant of the environment. Please, see Figure 5 in the main manuscript for a more detailed description.

| $X_{\text{met}}$        | 0.0  | 0.1  | 0.2  | 0.3  | 0.4  | 0.5  | 0.6  | 0.7  | 0.8  | 0.9  | 1.0  |
|-------------------------|------|------|------|------|------|------|------|------|------|------|------|
| $\epsilon_{\text{sim}}$ | 61.0 | 49.9 | 42.1 | 36.5 | 32.2 | 28.8 | 26.1 | 23.8 | 21.8 | 20.1 | 18.6 |
| $\epsilon_{\text{exp}}$ | 77.6 | 71.1 | 65.2 | 59.8 | 54.8 | 50.2 | 46.1 | 42.2 | 38.7 | 35.5 | 32.5 |

**Table S1.** Simulated dielectric permittivity ( $\epsilon_{\text{sim}}$ ) and the experimental dielectric permittivity ( $\epsilon_{\text{exp}}$ ) as a function of the corresponding values of mole fraction of methanol ( $X_{\text{met}}$ ).

| GUA-Asp          |     |     |               |               |               |               |               |               |               |               |               |
|------------------|-----|-----|---------------|---------------|---------------|---------------|---------------|---------------|---------------|---------------|---------------|
| $X_{\text{met}}$ | 0.0 | 0.1 | 0.2           | 0.3           | 0.4           | 0.5           | 0.6           | 0.7           | 0.8           | 0.9           | 1.0           |
| mindist (nm)     | nb  | nb  | 0.51          | 0.54          | 0.52          | 0.52          | 0.52          | 0.52          | 0.53          | 0.53          | 0.54          |
| N1_H1 OD1        | nb  | nb  | 43.8<br>(6.4) | 44.3<br>(3.7) | 48.3<br>(3.4) | 46.5<br>(3.6) | 48.8<br>(4.8) | 50.5<br>(4.3) | 50.0<br>(2.2) | 48.4<br>(4.4) | 47.5<br>(1.1) |
| N1_H1 OD2        | nb  | nb  | 48.2<br>(6.2) | 41.2<br>(5.2) | 48.0<br>(1.3) | 51.6<br>(1.8) | 50.3<br>(1.9) | 50.6<br>(3.2) | 49.1<br>(3.3) | 47.5<br>(3.1) | 47.2<br>(1.5) |
| N2_H21 OD1       | nb  | nb  | 28.8<br>(5.5) | 29.2<br>(3.4) | 31.9<br>(2.4) | 38.8<br>(0.5) | 38.1<br>(2.0) | 38.2<br>(3.4) | 38.8<br>(3.5) | 39.2<br>(4.0) | 42.5<br>(2.2) |
| N2_H21 OD2       | nb  | nb  | 24.8<br>(6.8) | 32.8<br>(4.1) | 32.6<br>(3.8) | 32.7<br>(4.2) | 35.8<br>(3.1) | 38.1<br>(4.5) | 40.4<br>(3.0) | 41.0<br>(4.0) | 43.3<br>(0.7) |
| N2_H22 OD1       | nb  | nb  | 1.2<br>(0.6)  | 1.5<br>(0.6)  | 1.4<br>(0.2)  | 1.3<br>(1.5)  | 1.9<br>(1.8)  | 0.4<br>(0.3)  | 0.2<br>(0.3)  | 1.2<br>(1.0)  | 0.0<br>(0.1)  |
| N2_H22 OD2       | nb  | nb  | 1.0<br>(0.5)  | 1.7<br>(0.4)  | 1.5<br>(1.8)  | 0.4<br>(0.4)  | 0.6<br>(0.3)  | 0.9<br>(0.9)  | 0.2<br>(0.3)  | 0.3<br>(0.3)  | 0.1<br>(0.1)  |
| CYT-Asp          |     |     |               |               |               |               |               |               |               |               |               |
| $X_{\text{met}}$ | 0.0 | 0.1 | 0.2           | 0.3           | 0.4           | 0.5           | 0.6           | 0.7           | 0.8           | 0.9           | 1.0           |
| mindist (nm)     | nb  | nb  | nb            | nb            | nb            | nb            | nb            | 0.51          | nb            | 0.51          | 0.51          |
| N4_H41 OD1       | nb  | nb  | nb            | nb            | nb            | nb            | nb            | 40.4<br>(4.2) | nb            | 43.1<br>(3.2) | 45.5<br>(1.2) |
| N4_H41 OD2       | nb  | nb  | nb            | nb            | nb            | nb            | nb            | 38.6<br>(2.3) | nb            | 41.8<br>(2.6) | 45.0<br>(2.8) |
| N4_H42 OD1       | nb  | nb  | nb            | nb            | nb            | nb            | nb            | 2.8<br>(1.5)  | nb            | 1.0<br>(0.7)  | 1.2<br>(1.5)  |
| N4_H42 OD2       | nb  | nb  | nb            | nb            | nb            | nb            | nb            | 1.9<br>(0.9)  | nb            | 0.6<br>(0.5)  | 1.1<br>(0.3)  |

**Table S2.** Analysis of H-bonding occupancies with Asp for all conformers in the neighborhood of a distance at which a given PMF attains its lowest value (mindist) for all systems with a negative  $\Delta G$  for binding (“nb” refers to non-binders with  $\Delta G \geq 0$  for which structural analysis was not performed). Please, see Methods section for detailed definitions. URA-Asp and ADE-Asp systems are not included as they do not exhibit negative  $\Delta G$ s for binding at any values of  $X_{\text{met}}$ . All trajectories were divided into 4 equally sized parts and the reported values, given here in %, refer to the average occupancies and the standard deviations (in parentheses) over the 4 parts.

| $X_{\text{met}}$ | ADE          |            | CYT          |            | GUA          |            | URA          |            |
|------------------|--------------|------------|--------------|------------|--------------|------------|--------------|------------|
|                  | mindist (nm) | % stacked  |
| 0.0              | 0.54         | 17.9 (1.9) | 0.40         | 94.2 (0.5) | 0.40         | 98.5 (0.2) | 0.39         | 97.7 (0.3) |
| 0.1              | 0.54         | 15.8 (2.4) | 0.39         | 94.6 (0.4) | 0.40         | 98.4 (0.3) | 0.36         | 99.7 (0.1) |
| 0.2              | 0.57         | 9.3 (0.6)  | 0.39         | 93.0 (0.6) | 0.50         | 29.0 (1.2) | 0.40         | 96.1 (0.5) |
| 0.3              | 0.57         | 8.3 (0.5)  | 0.46         | 41.7 (1.8) | 0.51         | 27.8 (5.5) | 0.39         | 96.3 (0.3) |
| 0.4              | 0.58         | 7.2 (1.2)  | 0.47         | 37.9 (2.2) | 0.57         | 11.1 (0.5) | 0.39         | 96.3 (0.4) |
| 0.5              | 0.58         | 9.0 (0.6)  | 0.50         | 18.8 (1.8) | 0.57         | 9.9 (1.3)  | 0.40         | 95.8 (0.4) |
| 0.6              | 0.61         | 5.4 (0.5)  | 0.50         | 17.7 (1.7) | 0.54         | 13.8 (0.8) | 0.39         | 96.4 (0.4) |
| 0.7              | 0.61         | 5.1 (0.6)  | 0.50         | 19.0 (1.0) | 0.57         | 9.1 (2.1)  | 0.40         | nb         |
| 0.8              | 0.58         | 7.3 (0.3)  | 0.50         | 17.8 (1.8) | 0.64         | 4.2 (0.7)  | 0.40         | nb         |
| 0.9              | 0.61         | 5.5 (1.1)  | 0.50         | nb         | 0.57         | 8.8 (2.0)  | 0.40         | nb         |
| 1.0              | 0.61         | 4.8 (0.7)  | 0.50         | nb         | 0.64         | 4.1 (1.1)  | 0.40         | nb         |

**Table S3.** Analysis of stacking occupancies with Trp for all conformers in the neighborhood of a distance at which a given PMF attains its lowest value (mindist) for all systems with a negative  $\Delta G$  for binding (“nb” refers to non-binders with  $\Delta G \geq 0$  for which structural analysis was not performed). Please, see Methods section for further details. All trajectories were divided into 4 equally sized parts and the reported values, given here in %, refer to the average occupancies and the standard deviations (in parentheses) over the 4 parts.
